# Supplementary material for: Text message reminders as an adjunct to a substance use intervention for adolescents and young adults: Pilot feasibility and acceptability findings
Source: PubMed Central journal article supplement — Digit Health. 2020 Oct 12;6:2055207620965052. doi: 10.1177/2055207620965052 (PMC7557673; doi:10.1177/2055207620965052), 2020-10-12
Supplement: sj-pdf-1-dhj-10.1177_2055207620965052.pdf [file sj-pdf-1-dhj-10.1177_2055207620965052.pdf]

## Appendix A.

### Pilot Intervention Messages

| Educational Messages                                                                       | Baseline<br>(Total/Edu<br>Rank/Overall<br>Rank) | Post-<br>treatment<br>(Total) |
|--------------------------------------------------------------------------------------------|-------------------------------------------------|-------------------------------|
| 1. Live smart. Think of the future.                                                        | 36 / 1 / 1                                      | 2                             |
| 2. Got an urge? Try to distract yourself with something else.                              | 15 / 10 / 48                                    | 2                             |
| 3. Making thoughtful decisions to not use can help keep you out of trouble.                | 11 / 18 / 70                                    | 0                             |
| 4. Sometimes you have to sacrifice things you like for a better life.                      | 11 / 18 / 70                                    | 1                             |
| 5. Think about your future. Your health matters.                                           | 24 / 2 / 15                                     | 1                             |
| 6. Having a plan can help you stay in control.                                             | 12 / 14 / 64                                    | 1                             |
| 7. If you used to spend \$20 on drugs a week, by stopping you can save \$1,040 a year.     | 19 / 4 / 34                                     | 0                             |
| 8. We show that we care in different ways. Not using can be one of them.                   | 11 / 18 / 70                                    | 0                             |
| 9. Staying clean and sober takes work. Use your will power and remember to enjoy success!  | 8 / 23 / 91                                     | 1                             |
| 10. If you stay away from trouble places you will be less likely to be tempted or slip up. | 6 / 25 / 97                                     | 0                             |
| 11. You can have an urge and let it pass.                                                  | 13 / 12 / 58                                    | 0                             |
| 12. You can resist urges. They will pass.                                                  | 18 / 7 / 41                                     | 0                             |
| 13. You can't use difficult situations as an excuse.                                       | 19 / 4 / 34                                     | 1                             |
| 14. Don't view drugs as a reward. Right now they are a problem.                            | 12 / 14 / 64                                    | 0                             |

|                                                                                   |              |   |
|-----------------------------------------------------------------------------------|--------------|---|
| 15. Don't give in to temptation.                                                  | 21 / 3 / 25  | 0 |
| 16. Try something new. Try something that isn't drugs.                            | 18 / 7 / 41  | 0 |
| 17. Make smart choice and stick to it. No exceptions.                             | 17 / 9 / 44  | 0 |
| 18. Got an urge? Consider the consequences.                                       | 12 / 14 / 64 | 0 |
| 19. When facing temptation, call on your will power and remember your decision.   | 14 / 11 / 52 | 1 |
| 20. Setting and aiming for a goal can help you stay in control.                   | 12 / 14 / 64 | 0 |
| 21. Making an exception can be the first step down a bad path.                    | 10 / 22 / 79 | 0 |
| 22. Almost 570,000 people in the U.S. die every year due to drug use.             | 11 / 18 / 70 | 0 |
| 23. More people die from drug overdoses every year than from guns or car crashes. | 8 / 23 / 91  | 0 |
| 24. Plan ahead for tough situations.                                              | 13 / 12 / 58 | 1 |
| 25. Sometimes you have to give up things you like for a better future.            | 19 / 4 / 34  | 1 |

| Threatening/Consequential                                               | Baseline<br>(Total/Threat<br>Rank/Overall<br>Rank) | Post-treatment<br>(Total) |
|-------------------------------------------------------------------------|----------------------------------------------------|---------------------------|
| 1. If you don't live smart, you will end up in jail or dead.            | 16 / 6 / 47                                        | 1                         |
| 2. Got an urge? Think about the consequences.                           | 5 / 25 / 99                                        | 1                         |
| 3. You are going to get in trouble if you don't think and take control. | 10 / 19 / 79                                       | 1                         |
| 4. If you keep using, will you get the better life you want?            | 7 / 24 / 96                                        | 0                         |

---

|                                                                                               |              |   |
|-----------------------------------------------------------------------------------------------|--------------|---|
| 5. Giving in is giving up on your future.                                                     | 14 / 9 / 52  | 2 |
| 6. If you lose control, bad things can happen.                                                | 14 / 9 / 52  | 0 |
| 7. Do you even care about your money?                                                         | 14 / 9 / 52  | 0 |
| 8. If you really cared you would stop using.                                                  | 8 / 21 / 91  | 2 |
| 9. You made the choice to stay clean and sober.<br>Don't let yourself down.                   | 8 / 21 / 91  | 1 |
| 10. Stay away from trouble places.                                                            | 11 / 16 / 70 | 1 |
| 11. Stay away from trouble.                                                                   | 20 / 2 / 29  | 2 |
| 12. Remember, probation.                                                                      | 11 / 16 / 70 | 1 |
| 13. Remember, there are drug tests.                                                           | 13 / 13 / 58 | 1 |
| 14. Don't try to get away with it. It never works.                                            | 11 / 16 / 70 | 0 |
| 15. Don't forget the consequences from before.                                                | 13 / 13 / 58 | 1 |
| 16. Choose your friends wisely.                                                               | 24 / 1 / 15  | 3 |
| 17. You better not get in trouble!                                                            | 15 / 7 / 48  | 0 |
| 18. If you slip up you're going to get in trouble.                                            | 8 / 21 / 91  | 0 |
| 19. You're letting your down people who really<br>care about you.                             | 13 / 13 / 58 | 1 |
| 20. If you use you're disappointing people who<br>care about you.                             | 9 / 20 / 86  | 1 |
| 21. Think about who your friends really are. Are<br>they part of the problem or the solution? | 14 / 9 / 52  | 1 |
| 22. Who are you hurting when you use drugs?                                                   | 15 / 7 / 48  | 1 |
| 23. People like you better sober.                                                             | 17 / 4 / 44  | 2 |
| 24. Think about what you want in your future.                                                 | 17 / 4 / 44  | 0 |
| 25. Remember what happens when you get in<br>trouble.                                         | 19 / 3 / 34  | 1 |

---

| Supportive/Empowering                                                           | Baseline<br>(Total/Support<br>Rank/Overall<br>Rank) | Post-treatment<br>(Total) |
|---------------------------------------------------------------------------------|-----------------------------------------------------|---------------------------|
| 1. You chose to live smart. You can do it!                                      | 22 / 13 / 21                                        | 0                         |
| 2. It is normal to have an urge to use. You can get through it!                 | 9 / 23 / 86                                         | 0                         |
| 3. Think! Think! Think! Take control of things.                                 | 20 / 15 / 29                                        | 1                         |
| 4. This is about a better life. You have the power.                             | 19 / 17 / 34                                        | 0                         |
| 5. Think about your future!                                                     | 30 / 4 / 5                                          | 0                         |
| 6. You are in control.                                                          | 32 / 1 / 2                                          | 8                         |
| 7. Think about all the money you are saving!                                    | 28 / 6 / 10                                         | 3                         |
| 8. Remember, you really do care, even though sometimes you feel like you don't. | 10 / 21 / 79                                        | 1                         |
| 9. You made the choice. You can stay clean and sober!                           | 11 / 20 / 70                                        | 1                         |
| 10. You can stay away from trouble places!                                      | 9 / 23 / 86                                         | 1                         |
| 11. You can do it!                                                              | 23 / 10 / 18                                        | 2                         |
| 12. Be strong. Use will power. Enjoy success                                    | 20 / 15 / 29                                        | 0                         |
| 13. Take charge of your life. It's your future. Make it good.                   | 24 / 9 / 15                                         | 2                         |
| 14. You have the power.                                                         | 23 / 10 / 18                                        | 2                         |
| 15. You got this!                                                               | 32 / 1 / 2                                          | 3                         |
| 16. You can make it through the storms.                                         | 26 / 7 / 11                                         | 0                         |
| 17. Don't let others control you.                                               | 23 / 10 / 18                                        | 2                         |
| 18. You're stronger than you think.                                             | 32 / 1 / 2                                          | 6                         |
| 19. Remember to accept the things you cannot change.                            | 15 / 19 / 48                                        | 3                         |

|                                                                           |              |   |
|---------------------------------------------------------------------------|--------------|---|
| 20. You are loved.                                                        | 29 / 5 / 7   | 4 |
| 21. You chose to stop using because you care about your health.           | 6 / 25 / 97  | 1 |
| 22. Every day clean is a way of showing yourself you care.                | 10 / 21 / 79 | 0 |
| 23. Fight through the tough times!                                        | 19 / 17 / 34 | 0 |
| 24. Your future is not set in stone. You have the power to make it great! | 25 / 8 / 13  | 1 |
| 25. The people who really care about you will always be by your side.     | 22 / 13 / 21 | 2 |

| Commitment reminders                                                               | Baseline<br>(Total/Remind<br>Rank/Overall<br>Rank) | Post-treatment<br>(Total) |
|------------------------------------------------------------------------------------|----------------------------------------------------|---------------------------|
| 1. Stick with your choice to live smart.                                           | 20 / 11 / 29                                       | 0                         |
| 2. You chose to stop using. That means not using even when you have an urge.       | 9 / 23 / 86                                        | 0                         |
| 3. You made the decision to take control of things. Keep working toward your goal. | 13 / 16 / 58                                       | 0                         |
| 4. Your commitment is to a better life. Stick with the plan.                       | 21 / 8 / 25                                        | 0                         |
| 5. Think about the choice you made for your future!                                | 14 / 15 / 52                                       | 0                         |
| 6. Your decision to stop using means you are in control.                           | 10 / 20 / 79                                       | 0                         |
| 7. Do you care more about drugs or money? Remember your commitment.                | 11 / 19 / 70                                       | 0                         |
| 8. You chose to stop using. Remember, you care!                                    | 10 / 20 / 79                                       | 0                         |
| 9. Stay clean and sober. It's your choice.                                         | 10 / 20 / 79                                       | 2                         |

---

|                                                                     |              |   |
|---------------------------------------------------------------------|--------------|---|
| 10. Not using means staying away from trouble places.               | 4 / 25 / 100 | 0 |
| 11. Don't try to get away with something. Stick with your decision. | 12 / 17 / 64 | 0 |
| 12. Stay focused on your goal.                                      | 29 / 2 / 7   | 3 |
| 13. Stay in control of your life.                                   | 26 / 4 / 11  | 3 |
| 14. Remember why you are doing this. Think!                         | 22 / 6 / 21  | 0 |
| 15. This decision is for a better life.                             | 30 / 1 / 5   | 2 |
| 16. You decided. You can do it.                                     | 19 / 13 / 34 | 3 |
| 17. It's your decision. Today counts.                               | 29 / 2 / 7   | 1 |
| 18. Stay on track with your decision!                               | 25 / 5 / 13  | 0 |
| 19. Stick with the plan.                                            | 21 / 8 / 25  | 2 |
| 20. Remember how you got here and why you want to change.           | 9 / 23 / 86  | 0 |
| 21. You can resist urges.                                           | 22 / 6 / 21  | 3 |
| 22. Consider the consequences.                                      | 21 / 8 / 25  | 3 |
| 23. You quit because you want to be healthy.                        | 18 / 14 / 41 | 1 |
| 24. You made this choice for a better future.                       | 20 / 11 / 29 | 0 |
| 25. Remember why you decided to stop using? Stick with it!          | 12 / 17 / 64 | 2 |

---
